# Supplementary material for: Using the Consolidated Framework for Implementation Research (CFIR) to Evaluate the Implementation of the International Dysphagia Diet Standardisation Initiative (IDDSI) and Provision of Texture Modified Diets (TMDs) in age-care Facilities: Barriers and Enablers to Implementation
Source: Research Square preprint supplement (doi:10.21203/rs.3.rs-483462/v1), 2021-05-10
Supplement: Supplementary file 1 [file f79d7c063f77dab687f78341.docx]

**Additional file 3. Characteristics of participating aged-care facilities**

| Variable | | Site 1 | Site 2 | Site 3 | Site 4 | Site 5 | Total |
| --- | --- | --- | --- | --- | --- | --- | --- |
| Size of the facility* | | n=54 | n=95 | n=153 | n=97 | n=100 | Small n=1  Medium n=2  Large n=2 |
| Level of care | | Rest home | Rest home, Hospital | Rest home, Hospital | Hospital | Rest home, Hospital, Dementia | Rest home n=4  Hospital n=4  Dementia n=1 |
| Access to dietitian | Access to district health board dietitian by referral | Yes | Yes | Yes | Yes | Yes | n=5 |
| Own organizational dietitian | Yes | Yes | Yes | No | Yes | n=4 |
| Referral to private contract dietitian | No | No | No | Yes | Yes | n=2 |
| Type of foodservice | | Cook fresh | Cook fresh with packaged texture-modified meals | Cook fresh with packaged texture-modified meals | Cook fresh/cook freeze | Cook fresh | Cook fresh n=2  Cook fresh with packaged texture-modified meals n=2  Cook fresh/cook freeze n=1 |
| Meal fortification for all TMDs | | No | Yes | Yes | No | Yes | n=3 |
| Total number of residents | | n=35 | n=78 | n=153 | n=94 | n=98 | n=458 |
| Total number of residents on TMDs (% of total residents) | | n= 13 (37%) | n= 19 (24%) | n= 36 (24%) | n= 34 (36%) | n= 23 (23%) | n=125 (27%) |
| Soft and bite-sized | | n=7 (54%) | n=5 (26%) | n= 9 (25%) | n=21 (62%) | n=11 (48%) | n=53 (42%) |
| Minced and moist | | n=3 (23%) | n= 4 (21%) | n= 6 (17%) | n= 0 | n= 6 (26%) | n=19 (15%) |
| Pureed | | n=3 (23%) | n= 10 (53%) | n= 21 (58%) | n= 13 (38%) | n= 6 (26%) | n= 53 (42%) |
| Total number of residents on thickened fluids (% of total residents) | | n= 0 | n= 5 (6%) | n= 9 (6%) | n= 11 (12%) | n= 5 (5%) | n=30 (7%) |
| Moderately thickened | | n= 0 | n= 0 | n= 6 (67%) | n= 4 (36%) | n= 2 (40%) | n=12 (40%) |
| Mildly thickened | | n= 0 | n= 4 (80%) | n= 3 (33%) | n= 7 (64%) | n= 3 (60%) | n=17 (57%) |
| Slightly thickened | | n= 0 | n= 1 (20%) | n= 0 | n= 0 | n= 0 | n=1 (3%) |

** facilities size was categorized according to the size of aged-care facilities in Auckland from the health ministry database (small – less than 55; medium – 55 to 99; large – 100 to 200); TMD – texture modified diet*
